# Supplementary material for: Solution characterization of a hyperbranched polysaccharide carbamate derivative and specific phase separation behavior due to chain branching
Source: Royal Society of Chemistry journal article supplement (doi:10.1039/d3sm01074k), 2023-01-01
Supplement: d3sm01074k1.pdf [file d3sm01074k1.pdf]

*Supporting Information for*  
**Solution characterization of a hyperbranched polysaccharide  
carbamate derivative and specific phase separation behavior due to  
chain branching**

Madoka Mizuguchi,<sup>a</sup> Keisuke Umeda,<sup>a</sup> Hisato Mizumoto,<sup>a</sup> and Ken Terao<sup>\*a</sup>

<sup>a</sup>Department of Macromolecular Science, Graduate School of Science, Osaka University, 1-1  
Machikaneyama-cho, Toyonaka, Osaka 560-0043, Japan

\* Corresponding author. E-mail address: terao.ken.sci@osaka-u.ac.jp

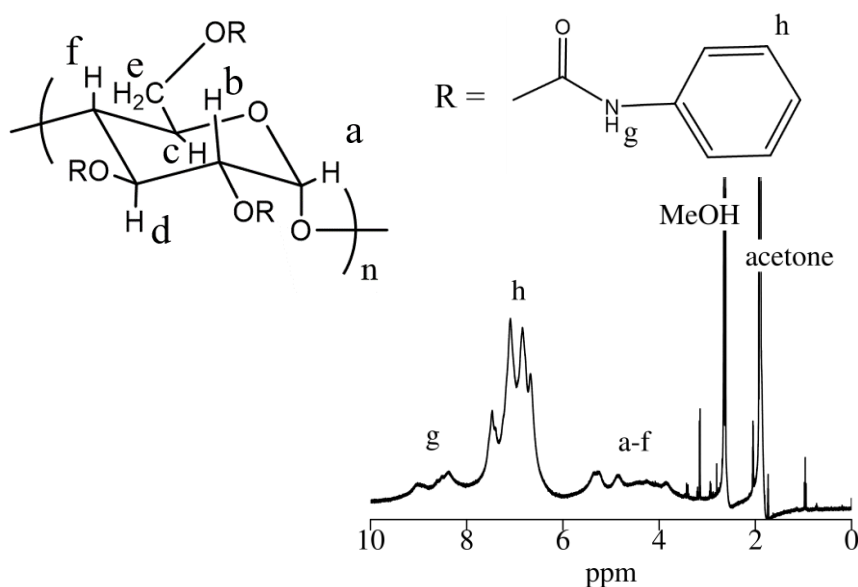

**Fig. S1.** <sup>1</sup>H-NMR spectrum of **HTPC880k** in acetone-*d*<sub>6</sub> at 25 °C.

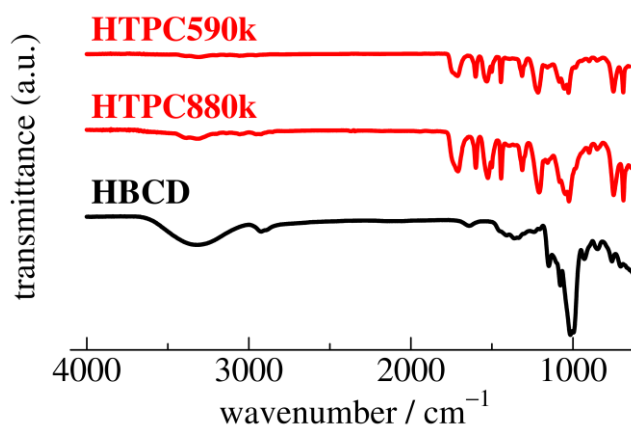

**Fig. S2.** FT-IR spectra for the indicated polysaccharide and polysaccharide derivative samples.

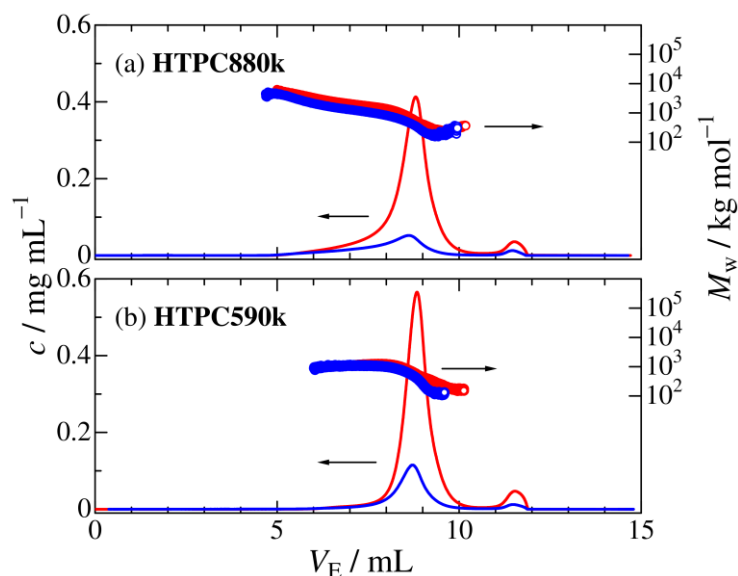

**Fig. S3.** Results of SEC-MALS measurement for **HTPC880k** (a) and **HTPC590k** (b) in THF at 25 °C. Different colored symbols indicate the different concentration of the injected solution. Retention volume  $V_E$  dependence of the polymer mass concentration  $c$  (blue solid curves) and the weight-average molar mass  $M_w$  (red circles).

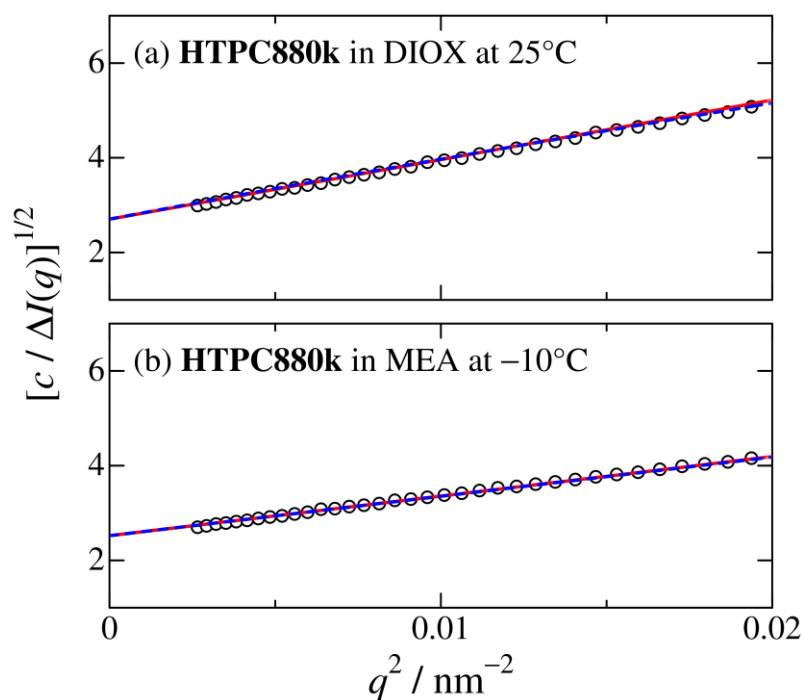

**Fig. S4.** Berry plots for **HTPC880k** in DIOX at 25 °C (a) and in MEA (b) at -10 °C.  $\Delta I(q)$ ,  $c$ , and  $q$  are the excess scattering intensity of X-ray, polymer mass concentration, and the magnitude of the scattering vector, respectively. The solid red and dashed blue lines indicate the initial slope to estimate the radius of gyration  $R_g$  and the theoretical values calculated from eqs 1-3 in the main text.

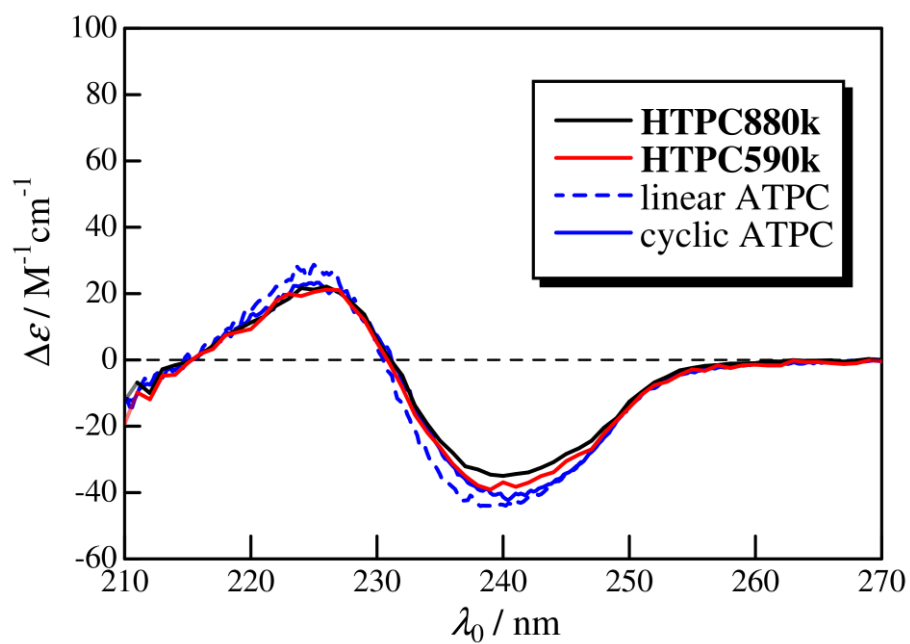

**Fig. S5.** Circular dichroism spectra for **HTPC880k** and **HTPC590k** in DIOX at 25 °C along with that for linear ATPC<sup>1</sup> and cyclic ATPC.<sup>2</sup>

#### References

1. K. Terao, T. Fujii, M. Tsuda, S. Kitamura and T. Norisuye, *Polym. J.*, 2009, **41**, 201-207.
2. K. Terao, N. Asano, S. Kitamura and T. Sato, *ACS Macro Lett*, 2012, **1**, 1291-1294.
